# Supplementary material for: Update on the epidemiology of work-related traumatic brain injury: a systematic review and meta-analysis
Source: HighWire-hosted journal article supplement (doi:10.1136/oemed-2020-107005), 2020-12-30
Supplement: oemed-2020-107005supp001_data_supplement.pdf [file oemed-2020-107005supp001_data_supplement.pdf]

## Supplemental File 1: Search Strategies

### MEDLINE

1. exp Work/
2. exp Occupational Injuries/ or exp Occupational Health/ or exp Accidents, Occupational/ or exp Occupational Diseases/
3. (worker\* or workplace\* or "work place\*" or work-related or "work related" or occupation\* or job\* or industr\*).mp.
4. (work\* adj3 (injur\* or accident\* or incident\* or trauma\* or wound\* or fatal\* or death\* or compensat\*)).mp.
5. 1 or 2 or 3 or 4 [\*\*\*\*Combined Work-related terms\*\*\*\*]
6. exp Craniocerebral Trauma/
7. ((head\* or brain\* or cerebr\* or crani\* or hemispher\* or intercrani\* or inter-crani\* or intracrani\* or intra-crani\* or skull\*) adj3 (injur\* or trauma\* or wound\* or contusion\* or laceration\* or damag\* or fractur\* or haematoma\* or hematoma\* or haemorrhag\* or hemorrhag\* or bleed\*)).mp.
8. (tbi\* or mtbi\*).mp.
9. concuss\*.mp.
10. "axonal injur\*".mp.
11. 6 or 7 or 8 or 9 or 10 [\*\*\*\*Combined TBI-related terms\*\*\*\*]
12. exp Epidemiology/
13. exp risk/
14. exp Epidemiologic Factors/
15. exp epidemiologic methods/
16. (epidemiolog\* or incidence or prevalence or mortality or rate\* or burden\* or risk\* or factor\* or etiolog\* or aetiolog\* or caus\*).mp.
17. 12 or 13 or 14 or 15 or 16 [\*\*\*\*Combined Epi terms\*\*\*\*]
18. 5 and 11 and 17 [\*\*\*\*epi of wr-TBI\*\*\*\*]
19. limit 18 to (english language and yr="2014 - 2020")

### EMBASE

1. exp Work/
2. exp occupational health/ or exp occupational accident/ or exp occupational disease/
3. (worker\* or workplace\* or "work place\*" or "work related" or work-related or occupation\* or job\* or industr\*).mp.
4. (work\* adj3 (injur\* or accident\* or incident\* or trauma\* or wound\* or fatal\* or death\* or compensat\*)).mp.
5. 1 or 2 or 3 or 4 [\*\*\*\*Combined Work-related terms\*\*\*\*]
6. exp head injury/
7. ((head\* or brain\* or cerebr\* or crani\* or hemispher\* or intercrani\* or inter-crani\* or intracrani\* or intra-crani\* or skull\*) adj3 (injur\* or trauma\* or wound\* or contusion\* or laceration\* or damag\* or fractur\* or haematoma\* or hematoma\* or haemorrhag\* or hemorrhag\* or bleed\*)).mp.
8. (tbi\* or mtbi\*).mp.
9. concuss\*.mp.
10. "axonal injur\*".mp.
11. 6 or 7 or 8 or 9 or 10 [\*\*\*\*Combined TBI-related terms\*\*\*\*]
12. exp epidemiology/
13. exp risk/
14. exp epidemiological data/
15. (epidemiolog\* or incidence or prevalence or mortality or rate\* or burden\* or risk\* or factor\* or etiolog\* or aetiolog\* or caus\*).mp.
16. 12 or 13 or 14 or 15
17. 5 and 11 and 16
18. limit 17 to (english language and yr="2014 - 2020")
19. limit 18 to (conference abstract or conference proceeding or "conference review")
20. 18 not 19
21. limit 20 to embase

### PsycINFO

1. exp working conditions/ or exp industrial accidents/ or exp occupational health/ or exp work related illnesses/
2. (worker\* or workplace\* or "work place\*" or work-related or "work related" or occupation\* or job\* or industr\*).mp.
3. (work\* adj3 (injur\* or accident\* or incident\* or trauma\* or wound\* or fatal\* or death\* or compensat\*)).mp.
4. 1 or 2 or 3
5. exp traumatic brain injury/ or exp brain damage/ or exp head injuries/

6. ((head\* or brain\* or cerebr\* or crani\* or hemispher\* or intercrani\* or inter-crani\* or intracrani\* or intra-crani\* or skull\*) adj3 (injur\* or trauma\* or wound\* or contusion\* or laceration\* or damag\* or fractur\* or haematoma\* or hematoma\* or haemorrhag\* or hemorrhag\* or bleed\*)).mp.
7. (tbi\* or mtbi\*).mp.
8. concuss\*.mp.
9. "axonal injur\*".mp.
10. 5 or 6 or 7 or 8 or 9
11. exp epidemiology/
12. exp causality/ or exp etiology/ or exp risk factors/
13. (epidemiolog\* or incidence or prevalence or mortality or rate\* or burden\* or risk\* or factor\* or etiolog\* or aetiolog\* or caus\*).mp.
14. 11 or 12 or 13
15. 4 and 10 and 14
16. limit 15 to (english language and yr="2014 - 2020")

**CINAL**

- S1. (MH "Work")
- S2. (MH "Occupational Diseases+") OR (MH "Occupational-Related Injuries")
- S3. (MH "Accidents, Occupational+")
- S4. (AB (work\* or occupation\* or job\* or industr\*) OR TI (work\* or occupation\* or job\* or industr\*))
- S5. S1 OR S2 OR S3 OR S4
- S6. (MH "Head Injuries+")
- S7. TX (head\* or brain\* or cerebr\* or crani\* or hemispher\* or intercrani\* or inter-crani\* or intracrani\* or intra-crani\* or skull\*) n3 (injur\* or trauma\* or wound\* or contusion\* or laceration\* or damag\* or fractur\* or haematoma\* or hematoma\* or haemorrhag\* or hemorrhag\* or bleed\*)
- S8. TX tbi\* or mtbi\*
- S9. TX concuss\*
- S10. TX "axonal injur\*"
- S11. S6 OR S7 OR S8 OR S9 OR S10
- S12. (MH "Epidemiology+") OR (MH "Risk Factors+")
- S13. (MH "Risk for Injury (NANDA)+")
- S14. (MH "Epidemiological Research+")
- S15. TX (epidemiolog\* or incidence or prevalence or mortality or rate\* or burden\* or risk\* or factor\* or etiolog\* or aetiolog\* or caus\*)
- S16. S12 OR S13 OR S14 OR S15
- S17. S5 AND S11 AND S16 (Limiters - Published Date: 20140101-20200131; English Language)
