# Supplementary material for: Update on the epidemiology of work-related traumatic brain injury: a systematic review and meta-analysis
Source: HighWire-hosted journal article supplement (doi:10.1136/oemed-2020-107005), 2020-12-30
Supplement: oemed-2020-107005supp003_data_supplement.pdf [file oemed-2020-107005supp003_data_supplement.pdf]

**Supplemental Table 1: Studies specifically exploring wrTBI (n=18)**

(Sample sizes are for entire study population unless otherwise specified)

| Author & Year, Location [Period]                          | Design [sample size]                          | Study population                                          | Data source                                                    | Case definition: TBI                                                                                                                                                                 | Case definition: work                                                         | % wrTBI, Severity                        | Sex                         | Age (mean)                                                    | Industry/ Occupation<br>*collapsed small groups                                                                                                                                                                                                                                                                                                                                                                                                                                                                                                                                                                                                             | Mechanism of Injury                                                                                                                                                                                                                                                                                  | Return to Work Outcomes                                                                                                       | Quality Asses. |
|-----------------------------------------------------------|-----------------------------------------------|-----------------------------------------------------------|----------------------------------------------------------------|--------------------------------------------------------------------------------------------------------------------------------------------------------------------------------------|-------------------------------------------------------------------------------|------------------------------------------|-----------------------------|---------------------------------------------------------------|-------------------------------------------------------------------------------------------------------------------------------------------------------------------------------------------------------------------------------------------------------------------------------------------------------------------------------------------------------------------------------------------------------------------------------------------------------------------------------------------------------------------------------------------------------------------------------------------------------------------------------------------------------------|------------------------------------------------------------------------------------------------------------------------------------------------------------------------------------------------------------------------------------------------------------------------------------------------------|-------------------------------------------------------------------------------------------------------------------------------|----------------|
| <b>Amodio et al. 2017</b> Toronto, Canada [2003]          | Retrospective medical record review [N=98]    | WSIB referrals to neurology rehabilitation centre         | Chart review of medical records                                | Diagnosed with TBI                                                                                                                                                                   | Insured workers (WSIB)                                                        | 100%                                     | 74.5% male                  | 41.46 ± 11.09<br>Male: 41.52 ± 11.39<br>Female: 41.28 ± 10.36 | Managers/ professionals/ technicians & associate professionals: 21.4% (12.3% of males, 52% of females)<br>Skilled agricultural, forestry & fishery workers/ plant machine operators and assemblers: 37.8% (45.2% of males, female percentage not reported)<br>Remainder not reported due to small cell size.                                                                                                                                                                                                                                                                                                                                                | -                                                                                                                                                                                                                                                                                                    | -                                                                                                                             | 23/28 (82%)    |
| <b>Chang et al. 2014</b> Victoria, Australia [2004-2011]  | Cross-sectional study [N=4,186]               | Insured workers in Victoria                               | Victorian WorkCover Authority; Australian Bureau of Statistics | TOOCs: "(1) 'intracranial injuries' and bodily location 'cranium' or 'brain'; or (2) 'fractures' and bodily location 'head' (not tooth/teeth), 'head and neck', or 'head and other'" | Compensation Research Database WC claims                                      | 100%, 1.8% of which were fatal           | 63.6% male                  | 38.9 ± 13.2<br>Male: 38.5 ± 13.2<br>Female: 39.5 ± 13.2       | Manufacturing: 13.2% (17.1% of males, 6.4% of females)<br>Construction: 8.3% (12.7% of males, 0.7% of females)<br>Wholesale trade: 5.7% (6.9% of males, 3.6% of females)<br>Retail trade: 5.9% (5.3% of males, 7.0% of females)<br>Transport, postal & warehousing: 9.4% (13.1% of males, 3.0% of females)<br>Public admin. & safety: 8.1% (9.8% of males, 5.3% of females)<br>Education & training: 13.9% (5.7% of males, 28.1% of females)<br>Healthcare & social assistance: 9.3% (2.9% of males, 20.3% of females)<br>Arts & recreation services: 5.4% (4.9% of males, 6.4% of females)<br>*Other (< 5% each): 20.9% (21.8% of males, 18.8% of females) | Struck by/against: 53.1% (51.4% of males, 56.1% of females)<br>Falls/trips/slips: 23.7% (21.0% of males, 28.4% of females)<br>Assaults & violence: 12.5% (14.8% of males, 8.5% of females)<br>MVC: 7.2% (9.1% of males, 3.9% of females)<br>Other/unspecified: 3.5% (3.7% of males, 3.1% of females) | 74.5% lost time from work (75.2% of males, 73.3% of females), 24.2% lost more than 10 days (27.7% of males, 18.2% of females) | 30/34 (88%)    |
| <b>Colangelo et al. 2016</b> Edmonton, Canada [2007-2011] | Retrospective cohort study [N=218]            | WC Board of Alberta rehabilitation facility               | Workers' Compensation Board                                    | Brain injury diagnosis referred for neuropsychologist assessment<br>Severity: Loss of consciousness                                                                                  | WC Board rehabilitation facility patients receiving LOC at time-loss benefits | 100%, 60.1% had time of injury           | 86.2% male                  | 42.8 ± 12.6                                                   | -                                                                                                                                                                                                                                                                                                                                                                                                                                                                                                                                                                                                                                                           | MVC: 29.8%<br>Blunt force head trauma: 29.4%<br>Slip & fall: 13.8%<br>Fall: 18.3%<br>Assault: 4.6%<br>Explosion: 3.2%<br>Other: 0.9%                                                                                                                                                                 | 59.2% in brain injury program (110.0 ± 105.7 days); 17.1% not fit to work post-injury                                         | 23/28 (82%)    |
| <b>Colantonio et al. 2016</b> Ontario, Canada [2010]      | Descriptive retrospective cohort study [N=50] | Participants discharged from a neurology services program | Medical records, self-report surveys                           | "Mild to moderate TBI"                                                                                                                                                               | WSIB reported injuries                                                        | 100%, classified as mild-to-moderate TBI | Gender reported as 64% male | 44.5 ± 11.9                                                   | -                                                                                                                                                                                                                                                                                                                                                                                                                                                                                                                                                                                                                                                           | -                                                                                                                                                                                                                                                                                                    | 50% able to return to work                                                                                                    | 26/28 (93%)    |

|                                                                   |                                                             |                                                                  |                                                                                  |                                                                                                                                                          |                                                                                                                                        |                                                                                 |                                      |                                                             |                                                                                                                                                                                                                                                                                                                                                                                                                                                                                                                                                                                                                                                                                                                                                            |                                                                                                                                            |   |             |
|-------------------------------------------------------------------|-------------------------------------------------------------|------------------------------------------------------------------|----------------------------------------------------------------------------------|----------------------------------------------------------------------------------------------------------------------------------------------------------|----------------------------------------------------------------------------------------------------------------------------------------|---------------------------------------------------------------------------------|--------------------------------------|-------------------------------------------------------------|------------------------------------------------------------------------------------------------------------------------------------------------------------------------------------------------------------------------------------------------------------------------------------------------------------------------------------------------------------------------------------------------------------------------------------------------------------------------------------------------------------------------------------------------------------------------------------------------------------------------------------------------------------------------------------------------------------------------------------------------------------|--------------------------------------------------------------------------------------------------------------------------------------------|---|-------------|
| <b>de Miranda et al. 2014</b> Brazil [2009]                       | Epidemiologic al cross-sectional study [N=2,006]            | Employees who are hired according to Consolidation of Labor Laws | Ministry of Work and Employment datasets                                         | ICD-10 (S06 to S06.9)                                                                                                                                    | "employees receiving social security benefit due to work typical accidents"                                                            | 100%                                                                            | 88% male in subset of 1074 (Table 2) | Occupation subgroups ranged from 32.7 ± 11.5 to 38.9 ± 14.6 | Transport, Storage & Mail: 12.27%<br>Water, Sewage & Waste Management: 1.63%<br>Construction: 9.99%<br>Commerce, Automobile & Motorcycle Repair: 26.11%<br>Public Administration, Defense & Social Security: 2.62%<br>Others: 46.59%<br>Not located: 0.79%                                                                                                                                                                                                                                                                                                                                                                                                                                                                                                 | -                                                                                                                                          | - | 27/32 (84%) |
| <b>Guerriero et al. 2016</b> Victoria, Australia [2004-2012]      | Retrospective cohort study [N=1,786]                        | Workers insured by WorkSafe Victoria                             | Compensation Research Database                                                   | Australian Standard Type of Occurrence Classification System: injury coded as "intracranial injury"                                                      | "A claim may be lodged once a worker is off work for more than ten days or medical expenses have surpassed a certain threshold amount" | 100%                                                                            | 63.1% male                           | 40.6 ± 13.5                                                 | Manufacturing: 11.1% (14.5% of men, 5.5% of women)<br>Electricity, gas, water & waste services: 10.9% (not stratified)<br>Construction: 9.8% (not stratified)<br>Wholesale trade: 6.1% (7.0% of men, 4.4% of women)<br>Retail trade: 6.4% (5.7% of men, 7.7% of women)<br>Transport, postal & warehousing: 10.0% (14.4% of men, 2.6% of women)<br>Public administration & safety: 7.5% (8.4% of men, 5.8% of women)<br>Education and training: 12.4% (5.4% of men, 24.3% of women)<br>Health care & social assistance: 9.2% (2.9% of men, 19.8% of women)<br>Arts & recreation services: 6.6% (5.6% of men, 8.4% of women)<br>*Other (< 5% each): 20% (not all stratified)<br><i>Study reported data stratified by sex, characterized as men and women</i> | -                                                                                                                                          | - | 30/32 (94%) |
| <b>Kica and Rosenman 2014</b> Michigan, United States [2010-2012] | Descriptive secondary analysis of surveillance data [N=318] | Michigan's 134 hospitals                                         | Hospital records, Michigan's Workers' Compensation Agency and death certificates | ICD-9 codes for skull fracture (800.0-.9, 801.0-.9, 802.0-.9, 803.0-.9, 804.0-.9); ICD-10 codes for skull fracture Severity: Loss of consciousness (y/n) | Workers' Compensation Agency records of wage replacement                                                                               | 100%, 4.72% of which were fatal (n=15); 44.97% had LOC, 22.44% missing LOC data | Gender reported as 84.6% male        | Average age: 43, Range: 17-75                               | Construction: 13.3%<br>Primary metal manufacturing: 11.5%<br>Public administration: 8.2%<br>Transportation & warehousing: 7.9%<br>Health care & social assistance: 6.1%<br>Wholesale trade: 6.1%<br>Retail trade: 5.7%<br>Administration & support & waste management and remediation services: 5.4%<br>Educational services: 5.4%<br>Agriculture, forestry, fishing & hunting: 5.0%<br>*Other (<5% each): 24.0%<br><i>Only reported for a subset of 279 cases</i>                                                                                                                                                                                                                                                                                         | Fall: 48.2%<br>Struck by: 34.3%<br>MVA: 7.5%<br>Assault: 5.0%<br>Medical condition: 5.0%<br><i>Only reported for a subset of 280 cases</i> | - | 30/34 (88%) |

|                                                                                                    |                                                                            |                                            |                                                                  |                                                                                                                                                            |                                                                          |                                              |                                                                            |                                                                                                                                          |                                                                                                                                                                                                                                                                                                                                                                                  |                                                                                                                                                                                                 |                                                                               |             |
|----------------------------------------------------------------------------------------------------|----------------------------------------------------------------------------|--------------------------------------------|------------------------------------------------------------------|------------------------------------------------------------------------------------------------------------------------------------------------------------|--------------------------------------------------------------------------|----------------------------------------------|----------------------------------------------------------------------------|------------------------------------------------------------------------------------------------------------------------------------------|----------------------------------------------------------------------------------------------------------------------------------------------------------------------------------------------------------------------------------------------------------------------------------------------------------------------------------------------------------------------------------|-------------------------------------------------------------------------------------------------------------------------------------------------------------------------------------------------|-------------------------------------------------------------------------------|-------------|
| <b>Konda et al. 2015</b><br>United States [1998-2007]                                              | Descriptive secondary analysis of surveillance data [N=586,600 (weighted)] | 67 US hospitals with 24 hour EDs           | National Electronic Injury Surveillance System (NEISS)           | NEISS-Work: 'concussion' (code 52), 'internal organ injury' (code 62) or 'fracture' (code 57) & 'head' (body part code 75)<br>Severity: non-fatal injuries | National Electronic Injury Surveillance System - Occupational supplement | 100%                                         | 68% male (weighted)                                                        | 15-24: 21%<br>25-34: 26%<br>35-44: 23%<br>45-54: 18%<br>55+: 12% (weighted)                                                              | Agriculture, forestry, fishing & hunting: 5%<br>Transportation & warehousing: 8%<br>Construction: 12%<br>Accommodation & food services: 8%<br>Public administration: 5%<br>Retail trade: 11%<br>Healthcare & social assistance: 11%<br>Manufacturing: 8%<br>Educational services: 5%<br>Professional & business services: %5<br>Unknown: 9%<br>*Other (<5% each): 12% (weighted) | Contact with objects and equipment: 43%<br>Falls: 36%<br>All others (including assaults/violence, transportation, etc.): 21% (weighted)                                                         | -                                                                             | 22/32 (69%) |
| <b>Konda et al. 2016</b><br>United States [2003-2010]                                              | Descriptive secondary analysis of surveillance data [N=2,210]              | Construction workers in the US             | Bureau of Labor Statistics Census of Fatal Occupational Injuries | OIIICS: TBIs: 060, 061, 062, 068, and 069. TBIs due to all firearm-related incidents<br>Severity: Fatal                                                    | Bureau of Labor Statistics Census of Fatal Occupational Injuries         | 100%, all fatal                              | 99% male                                                                   | 16-19: 3%<br>20-24: 9%<br>25-34: 21%<br>35-44: 23%<br>45-54: 24%<br>55-64: 13%<br>65+: 6%                                                | Construction                                                                                                                                                                                                                                                                                                                                                                     | Contact with objects and equipment: 16%<br>Falls: 57%<br>Transportation incidents: 21%<br>All others (including assaults/violence, fires and explosions, etc.): 5%                              | -                                                                             | 27/32 (84%) |
| <b>Kontos et al. 2017</b><br>Ontario, Canada [Not Reported]<br><i>*excluded from meta analysis</i> | Qualitative thematic analysis [N=32]                                       | Neurology clinic funded by the WSIB        | In-depth semi-structured qualitative interviews                  | Diagnosis of wTBI: "sustained a head injury and/or had a formal diagnosis of a work-related traumatic brain injury"                                        | "workers who have been injured at work" referred to clinic               | 100%                                         | 47% male                                                                   | 35-44: 23.0%<br>45-54: 34.6%<br>55-64: 42.3%<br><i>Reported for a subset of 26 participants (6 participants without age information)</i> | Education: 17.9%<br>Business & Administration, Sales & Service: 21.4%<br>Healthcare: 17.9%<br>Manufacturing, Primary Industry: 25.0%<br>Security, Trades & Transportation: 17.9%<br><i>Reported for a subset of 28 participants (4 participants without industry/sector information)</i>                                                                                         | Assault: 14.3%<br>Fall/slip: 32.1%<br>MVC: 14.3%<br>Struck by/against object: 39.3%<br><i>Reported for a subset of 28 participants (4 participants without mechanism of injury information)</i> | -                                                                             | 20/28 (71%) |
| <b>Kristman et al. 2014</b><br>Ontario, Canada [1997-1998]                                         | Retrospective cohort study [N=728]                                         | Worker's compensation system               | Administrative data from the WSIB, Ontario Health Insurance Plan | WSIB lost-claims data: brain part of body code (1100) and the concussion nature of injury code (6200).<br>Severity: mild (method not specified)            | Workplace Safety and Insurance Board lost-time claims                    | 100%, all mTBI                               | 65.8% male<br><i>Reported as sex (male/female), discussed as man/woman</i> | 18-24: 13.6%<br>25-34: 28.2%<br>35-44: 24.5%<br>45-54: 21.0%<br>55+: 12.6%                                                               | -                                                                                                                                                                                                                                                                                                                                                                                | -                                                                                                                                                                                               | -                                                                             | 30/32 (94%) |
| <b>§ Mollayeva et al. 2016</b><br>Ontario, Canada [2004]                                           | Cross-sectional study [N=66]                                               | WSIB insured workers with lost time claims | Workplace Safety and Insurance Board                             | Diagnosis of 'concussion', 'closed head injury', 'contusion', or 'head injury with sequelae consistent with brain injury'                                  | WSIB lost-time claims due to TBI caused by physical assaults             | 100%, 76% classified as [mTBI] or concussion | 40.9% male                                                                 | 37 (median)<br>20-64 range                                                                                                               | Health care/social service aids: 40.9%<br>Law enforcement/public administration sector: 33.3%<br>Education: 15.2%<br>Transportation: 7.6%<br>Other: 3.0%<br><i>Calculated from number of claims reported per sector</i>                                                                                                                                                          | Assault: 100%                                                                                                                                                                                   | 22.7% (n=15) returned to work by the end of 2004 (ten females and five males) | 23/32 (72%) |

|                                                                |                                                             |                                                |                                                                                                                        |                                                                                                                                                               |                                                                                                        |                                                                  |                               |                                                                                                         |                                                                                                                                                                                                                                                                                                                                           |                                                                                                                                                |                                                                                                                                                                                                                                                |                |
|----------------------------------------------------------------|-------------------------------------------------------------|------------------------------------------------|------------------------------------------------------------------------------------------------------------------------|---------------------------------------------------------------------------------------------------------------------------------------------------------------|--------------------------------------------------------------------------------------------------------|------------------------------------------------------------------|-------------------------------|---------------------------------------------------------------------------------------------------------|-------------------------------------------------------------------------------------------------------------------------------------------------------------------------------------------------------------------------------------------------------------------------------------------------------------------------------------------|------------------------------------------------------------------------------------------------------------------------------------------------|------------------------------------------------------------------------------------------------------------------------------------------------------------------------------------------------------------------------------------------------|----------------|
| <b>Paci et al. 2017</b><br>Quebec, Canada [2000-2014]          | Cross-sectional study [N=285]                               | Montreal General Hospital                      | Traumatic Brain Injury Database and the Trauma Registry Database                                                       | World Health Organization Task Force: mild TBI diagnosis<br>Severity: GCS                                                                                     | "Occurred at the workplace... or performing work duties" as identified in the Trauma Registry Database | 100%; 8.1% were fatal.<br>GCS: 76.8% 13-15, 7.7% 9-12, 15.4% 3-8 | 94.7% male                    | 43.62<br>16-76 range                                                                                    | Construction/trades: 42.5%<br>Vehicle driver/operator: 14.2%<br>Retail/sales: 11.5%<br>Manufacturing: 7.1%<br>City worker (including maintenance, police, & firefighters): 6.2%<br>Mechanic: 4.0%<br>*Others (<5% each): 14.6%<br><i>Reported for a subset of 226</i>                                                                     | Falls: 64.1%<br>MVC: 17.8%<br>Falling object/ projectile: 15.8%<br>Electrocution: 1.2%<br>Assault: 1.2%<br><i>Reported for a subset of 259</i> | -                                                                                                                                                                                                                                              | 28/34<br>(82%) |
| <b>Shafi et al. 2019</b><br>Victoria, Australia [2004-2012]    | Population-based, retrospective cohort study [N=3,129]      | WorkSafe Victoria claimants                    | Compensation Research Database                                                                                         | TOOCs: 'affliction nature group' was coded as 'intracranial injuries'<br>Severity: post-injury hospitalization                                                | Workers' compensation claims                                                                           | 100%, all mTBI                                                   | 58.0% male                    | 15-24: 15.0%<br>25-34: 25.0%<br>35-44: 21.5%<br>45-54: 23.2%<br>55<: 15.2%                              | Healthcare & social assistance: 11.00% (3.14% of males, 21.75% of females)<br>Education & training: 16.0% (7.28% of males, 27.98% of females)<br>Public administration & safety: 6.5% (7.66% of males, 4.87% of females)<br>Others: 66.7% (81.92% of males, 45.40% of females)<br><i>Sex stratified reporting calculated from table 2</i> | Hit by moving objects: 32.1%<br>Falls, trips & slips: 26.1%<br>Hitting objects with body: 24.9%<br>Assault: 8.8%<br>MVA & other: 8.1%          | 18.40% took time off work (within a 3-month time frame)<br>(21.00% of males, 14.75% of females)                                                                                                                                                | 30/32<br>(94%) |
| <b>Sharma et al. 2019</b><br>Ontario, Canada [2014-2016]       | Prospective cohort study [N=102]                            | neurology services clinic                      | Self-report questionnaires                                                                                             | "head and/or brain injury"                                                                                                                                    | WSIB assessment referral                                                                               | 100%                                                             | 53.9% male                    | 54% aged 45-64                                                                                          | Education: 21.6%<br>Healthcare: 11.4%<br>Construction & landscaping: 11.4%<br>Other: 55.6%                                                                                                                                                                                                                                                | Struck by/against an object or person: 55% [14% were assaults]<br>Falls: 30.3%<br>MVC: 11%<br>Other: 3.7%                                      | 63.3% returned to work, 42.1% on modified duties                                                                                                                                                                                               | 21/28<br>(75%) |
| <b>Slavova and Bunn 2015</b><br>Kentucky, United States [2011] | Descriptive secondary analysis of surveillance data [N=596] | Kentucky EDs or hospital facilities            | ED visits, hospital discharge data, and workers' compensation first report of injury data)                             | ICD-9-CM diagnosis code of 850 (ED and hospital); WC data: (i) nature of injury "concussion" (code 07) or (ii) a case narrative text search for "concussion." | Workers' compensation designated payer                                                                 | 100%                                                             | Gender reported as 63.6% male | Median: 39<br>16-24: 18.3%<br>25-34: 22.1%<br>35-44: 23.3%<br>45-54: 19.6%<br>55-64: 13.3%<br>65≤: 3.4% | Only available for 339 cases linked with WC data, % of that total:<br>Services industry (n=104; 30.7%)<br>Transportation/public utilities (n= 50; 14.7%)<br>Whole sale and retail (n= 50; 14.7%)<br>Manufacturing (n= 32; 9.4%)                                                                                                           | MVC: 10.7%<br>Fall: 36.2%<br>Struck by/against: 43.8%<br>Other: 9.2%<br><i>Reported for a subset of 552, 44 cases missing information</i>      | -                                                                                                                                                                                                                                              | 26/32<br>(81%) |
| <b>§ Terry et al. 2018</b><br>Vancouver, Canada [2015-2017]    | Case-control study [wrTBI subset N=46]                      | Four outpatient rehabilitation clinics for TBI | Standardized questionnaires during initial assessment (2-26 weeks post injury) and follow up (21-47 weeks post injury) | World Health Organization Neurotrauma Task Force definition of mild TBI                                                                                       | Workers' compensation claims                                                                           | 45.10%                                                           | 60.9% male                    | 39.0 ± 11.8                                                                                             | Manual Labor: 28.3%<br>Skilled craft or trade: 19.6%<br>Transport: 2.2%<br>Sales and service: 15.2%<br>Management or professional: 8.7%<br>Other: 26.1%                                                                                                                                                                                   | Struck by object: 43.5%<br>MVC: 6.5%<br>Fall: 30.4%<br>Assault: 10.9%<br>Other: 8.7%                                                           | Initial Assessment: 2.2% full return to work, 8.7% had partial return, 87.0% on leave.<br>Follow up (n=38): 44.7% full return to work, 18.4% partial return to work, 36.8% no return to work.<br><i>8 wrTBI participants lost to follow up</i> | 27/28<br>(96%) |

|                          |                                             |                                  |                 |                                                                                          |                                                           |                |                           |                 |                                                                                                                                                                                                                                                                                                                                                                                                                                                                                                                    |                                                                                                                                     |             |
|--------------------------|---------------------------------------------|----------------------------------|-----------------|------------------------------------------------------------------------------------------|-----------------------------------------------------------|----------------|---------------------------|-----------------|--------------------------------------------------------------------------------------------------------------------------------------------------------------------------------------------------------------------------------------------------------------------------------------------------------------------------------------------------------------------------------------------------------------------------------------------------------------------------------------------------------------------|-------------------------------------------------------------------------------------------------------------------------------------|-------------|
| <b>Xiong et al. 2016</b> | Retrospective medical record review [N=209] | Toronto Rehabilitation Institute | Medical records | TBI diagnosis Severity: mild, $\leq 30$ min LOC, GCS score of 13-15, and PTA $\leq 24$ h | WSIB referral to the neurology service at a mild hospital | 100%, all mild | Sex reported as 71.3% men | 40.2 $\pm$ 11.1 | Managers/ professionals/ technicians or - associate professionals: 12.9% (5.4% of men, 31.7% of women)<br>Clerical support workers/service and sales workers: 13.9% (7.4% of men, 30% of women)<br>Skilled agricultural, forestry and fishery workers/ plant and machine operators and assemblers: 35.9% (46.3% of men, 10% of women)<br>Elementary occupations (laborers): 26.8% (32.2% of men, 13.3% of women)<br>Missing: 10.5%<br><i>Study reported data stratified by sex, characterized as men and women</i> | 22% working, full- or part-time (18.1% of men, 31.7% of women), 78% not working (disability benefit) (81.2% of men, 68.3% of women) | 25/28 (89%) |
|--------------------------|---------------------------------------------|----------------------------------|-----------------|------------------------------------------------------------------------------------------|-----------------------------------------------------------|----------------|---------------------------|-----------------|--------------------------------------------------------------------------------------------------------------------------------------------------------------------------------------------------------------------------------------------------------------------------------------------------------------------------------------------------------------------------------------------------------------------------------------------------------------------------------------------------------------------|-------------------------------------------------------------------------------------------------------------------------------------|-------------|

Acronyms: AIS - Abbreviated Injury Score, ED - Emergency Department, GCS - Glasgow Coma Scale, ICD - International Classification of Diseases (versions 9 or 10), ISS - Injury Severity Scale, LOC - loss of consciousness, mTBI - mild traumatic brain injury, MVA/C - motor vehicle accident/collision, OIICS - Occupational Injury and Illness Classification System, PTA - posttraumatic amnesia, TOOCS - Type of Occurrence Classification System, WC - Workers' Compensation, WSIB - Workplace Safety and Insurance Board (Ontario)

§ indicates studies in multiple summary tables
