# Supplementary material for: Update on the epidemiology of work-related traumatic brain injury: a systematic review and meta-analysis
Source: HighWire-hosted journal article supplement (doi:10.1136/oemed-2020-107005), 2020-12-30
Supplement: oemed-2020-107005supp005_data_supplement.pdf [file oemed-2020-107005supp005_data_supplement.pdf]

**Supplemental Table 3: Studies exploring traumatic brain injury with a wrTBI subset (n=9)**

(Sample sizes are for entire study population unless otherwise specified)

| Author & Year, Location [Period]                                                                    | Design [sample size]                                                                                                | Study population                                  | Data source                                                                     | Case definition: TBI                                                                                                                                    | Case definition: work                                 | % wrTBI                                                                                                   | Quality Asses. |
|-----------------------------------------------------------------------------------------------------|---------------------------------------------------------------------------------------------------------------------|---------------------------------------------------|---------------------------------------------------------------------------------|---------------------------------------------------------------------------------------------------------------------------------------------------------|-------------------------------------------------------|-----------------------------------------------------------------------------------------------------------|----------------|
| <b>Atci et al. 2015</b><br>Elazig, Turkey<br>[2014-2014]                                            | Retrospective medical record review<br>[N=3,524]                                                                    | TBI at Elazig Training and Research Hospital      | Medical records (patients and hospital registration)                            | "All traumatic head injuries that resulted from any physical injury, falls and suicide attempt."<br>Severity: GCS 14-15 mild, 9-13 moderate, 3-8 severe | "Occupational accidents"                              | 10.73%<br><i>*Reported as 18.4% of falls or 378 cases</i>                                                 | 20/30<br>(67%) |
| <b>Autret et al. 2015</b><br>Rennes, France<br>[2008-2010]                                          | Retrospective cohort study<br>[TBI subset n=34]                                                                     | Brain injuries at a rehabilitation centre         | Medical charts, professional reintegration unit files, phone interviews         | "Traumatic brain injury"<br>Severity: GCS                                                                                                               | "Work-related injury"                                 | 35.29%<br><i>*Reported as 12/34 or 36.4%, the authors miscalculated the reported percentage</i>           | 18/28<br>(64%) |
| <b>Kahan et al. 2018</b><br>New Zealand<br>[2010-2011]                                              | Longitudinal cohort study<br>[N=205]                                                                                | TBI in the Hamilton and Waikato regions           | Brain Injury Incidence and Outcomes New Zealand In the Community (BIONIC) study | World Health Organization criteria for TBI diagnosis<br>Severity: GCS; 13-15 score = mild and post-traumatic amnesia (<24 hours)                        | "place of injury: work place"                         | 19.5%                                                                                                     | 23/28<br>(82%) |
| <b>Mauritz et al. 2014</b><br>Austria [2009-2011]                                                   | Retrospective cohort study<br>[N=81,112; Residents n=73,662; Visitors n=7,450]                                      | Hospital admissions for TBI                       | Hospital admissions as presented by Statistik Austria                           | ICD-10 codes S06.0-S06.9                                                                                                                                | "Cause of injury: work-related"                       | 2.57%<br><i>*Reported as 91 (1.2%) visitors from table I and 1989 (2.7%) residents from table II</i>      | 29/34<br>(85%) |
| <b>§ McIntosh et al. 2016</b><br>Australia<br>[2000-2013]                                           | Retrospective case series<br>[TBI Subset, n=58]                                                                     | Quad bike fatalities                              | National Coronial Information System                                            | AIS: 'Specific injury pathology: Traumatic brain injury'                                                                                                | "work activity"                                       | 18.97%, all fatal<br><i>*Reported as 11/58 in supplemental table A9</i>                                   | 22/32<br>(69%) |
| <b>§ Nosaka et al. 2015</b><br>Okayama, Japan<br>[2012-2014]<br><i>*excluded from meta analysis</i> | Retrospective cohort study<br>[TBI Subset, n=8]                                                                     | Traumatic injuries at Okayama University Hospital | Clinical records related to hospitalizations due to falls                       | AIS: H= head<br>Severity: Injury Severity Score                                                                                                         | "Working settings: Occupational"                      | 25%, 50% fatal<br><i>*Calculated from table 1</i>                                                         | 27/30<br>(90%) |
| <b>Rogers et al. 2015</b><br>United States [2010]                                                   | Retrospective, cross-sectional, descriptive study<br>[N=2,087]                                                      | TBI in Levels I and II trauma centres             | National Sample Program                                                         | ICD-9-CM codes (800-801.9, 803.0-804.9, 850.0-854.1, 959.01)<br>Severity: GCS score of 9 to 12 or a head AIS of 3 or 4                                  | Primary payer: Worker's compensation (half of wrTBIs) | 3%<br>[2.4% weighted]                                                                                     | 22/28<br>(79%) |
| <b>Russell and Daniell 2018</b><br>United States<br>[Not Reported]                                  | Cross-sectional study<br>[TBI subset n=199]<br><i>*Conducted survey to determine TBI history in 246 individuals</i> | TBI among theatre workers                         | Survey                                                                          | Positive response to the prompt: "Can you think of any instance in your life in which you have hit your head?"                                          | Self-reported: working in theater environments        | 70.35%<br><i>*Reported as n=140 wrTBI, percentage calculated based on 199 with history of head impact</i> | 20/28<br>(71%) |
| <b>§ Terry et al. 2018</b><br>Vancouver, Canada<br>[2015-2017]                                      | Case-control study<br>[N=102]                                                                                       | Four outpatient rehabilitation clinics for TBI    | Standardized semi structured interview questionnaires                           | World Health Organization Neurotrauma Task Force definition of mild TBI                                                                                 | Workers' compensation claims                          | 45.1%                                                                                                     | 27/28<br>(96%) |

Acronyms: AIS - Abbreviated Injury Score, GCS - Glasgow Coma Scale, ICD - International Classification of Diseases (versions 9 or 10), mTBI - mild traumatic brain injury

§ indicates studies in multiple summary tables
