# Supplementary material for: Update on the epidemiology of work-related traumatic brain injury: a systematic review and meta-analysis
Source: HighWire-hosted journal article supplement (doi:10.1136/oemed-2020-107005), 2020-12-30

**Supplemental file 3: Forest plots of meta analyses**

Figure 1 – Pooled proportion wrTBI population that is male

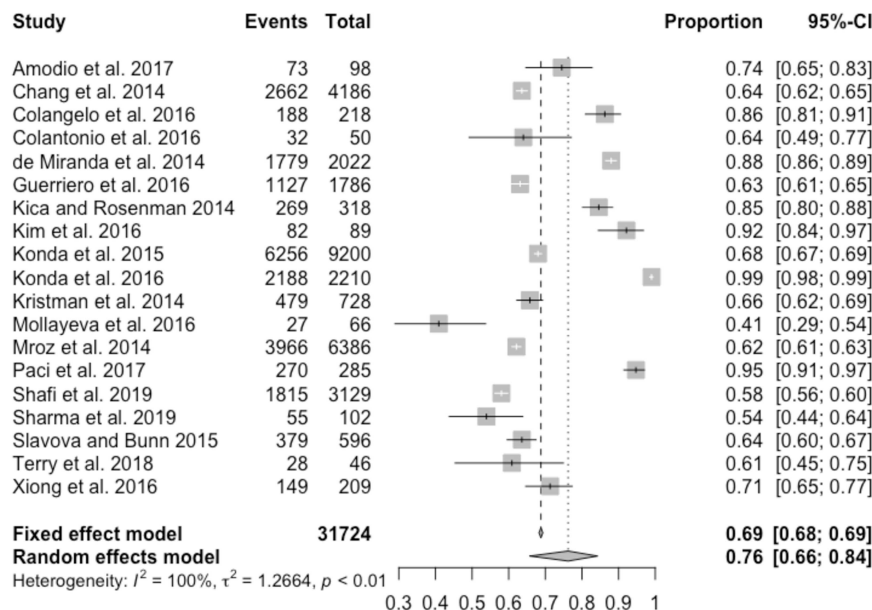

Figure 2 – Pooled mean age in wrTBI population

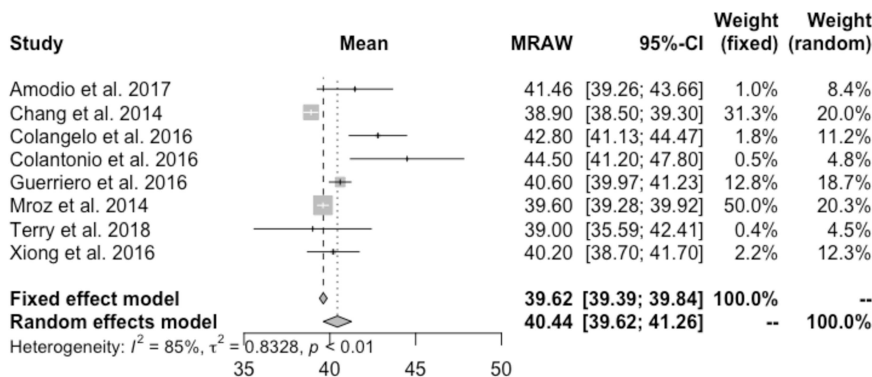

Figure 3 – Pooled proportion of wrTBI among work-related injuries

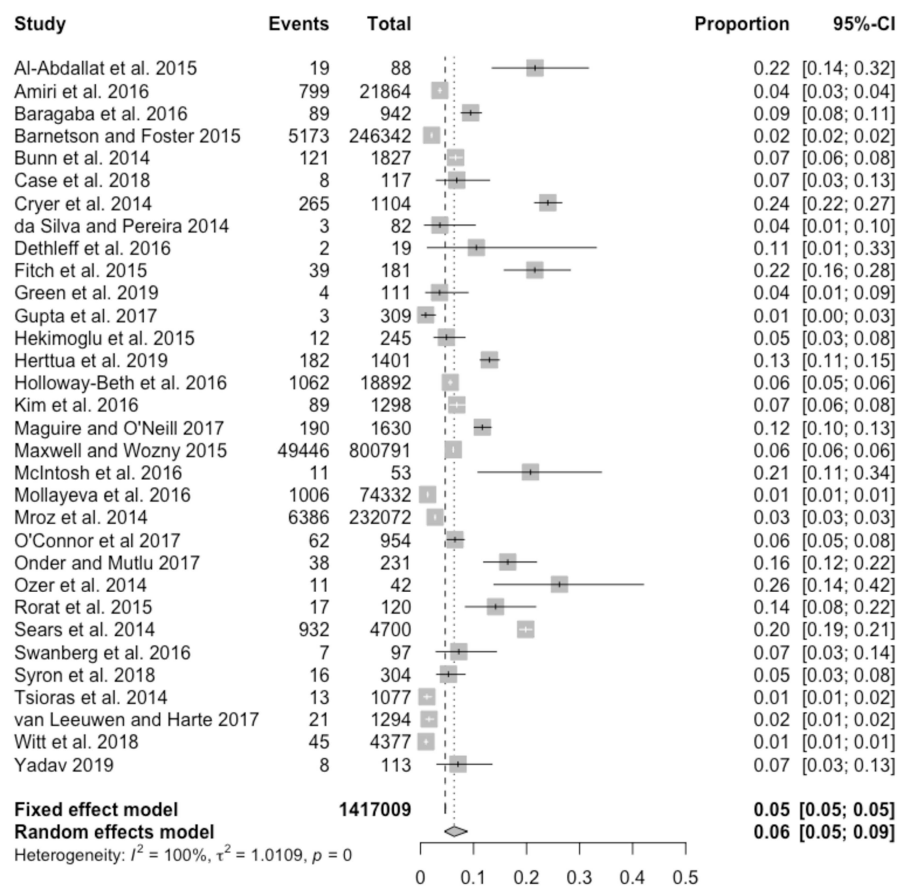

Figure 4 – Pooled proportion of wrTBI among TBI

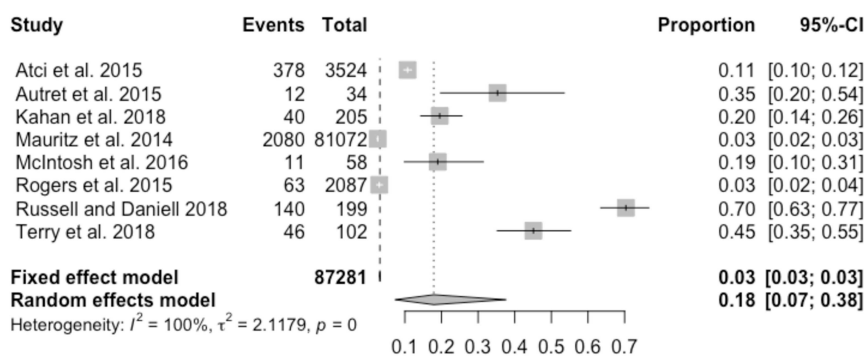

Figure 5 – Pooled proportion of wrTBI resulting in death

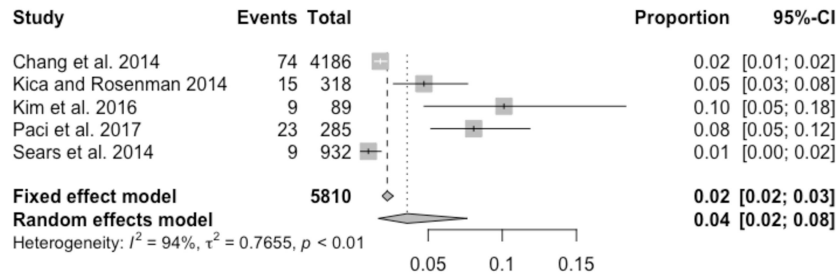

Supplement: oemed-2020-107005supp006_data_supplement.pdf [file oemed-2020-107005supp006_data_supplement.pdf]
